# Supplementary material for: Structural basis for macrolactonization by the pikromycin thioesterase
Source: Springer Nature journal article supplement (doi:10.1038/nchembio824), 2006-09-10
Supplement: nchembio824-S4.pdf [file nchembio824-S4.pdf]

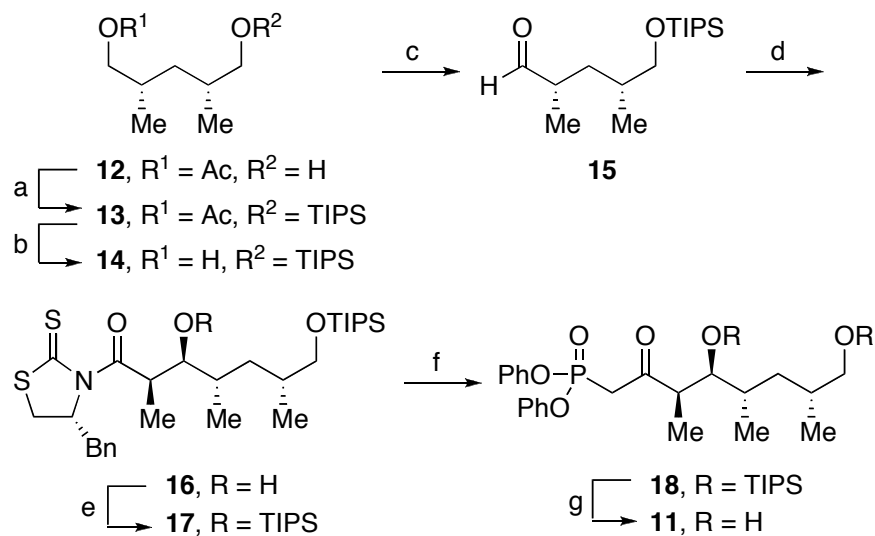

**Supplementary Scheme 1.** Synthesis of diphenylphosphonate pentaketide **11**. Reagents: a, TIPSOTf,  $\text{Et}_3\text{N}$ , 88%; b,  $\text{LiAlH}_4$ , 95%; c, Dess–Martin periodinane, 84%; d, *R*-4-benzyl-1,3-thiazolidine-2-thione,  $\text{TiCl}_4$ , (–)-sparteine, NMP, 85%; e, *i*- $\text{Pr}_2\text{NEt}$ , TIPSOTf, 80%; f,  $(\text{PhO})_2\text{P}(\text{O})\text{Me}$ , LiHMDS, 74%; g,  $\text{HF}:\text{MeCN}:\text{H}_2\text{O}$  (1:17:1), 52%. Ac = acetyl, Bn = benzyl, Ph = phenyl, Tf = triflate, TIPS = triisopropylsilyl.
